# Supplementary material
Source: publisher site journal article supplement (https://www.spandidos-publications.com/3904/downloadSupplementary)

Figure S1. TaqMan SNP genotyping of the *PNPLA3* gene. Vertical axis is the FAM C allele; horizontal axis is VIC G allele. SNP, single nucleotide polymorphism; *PNPLA3*, patatin-like phospholipase domain-containing 3; VIC, Victoria dye; FAM, fluorescein amidites.

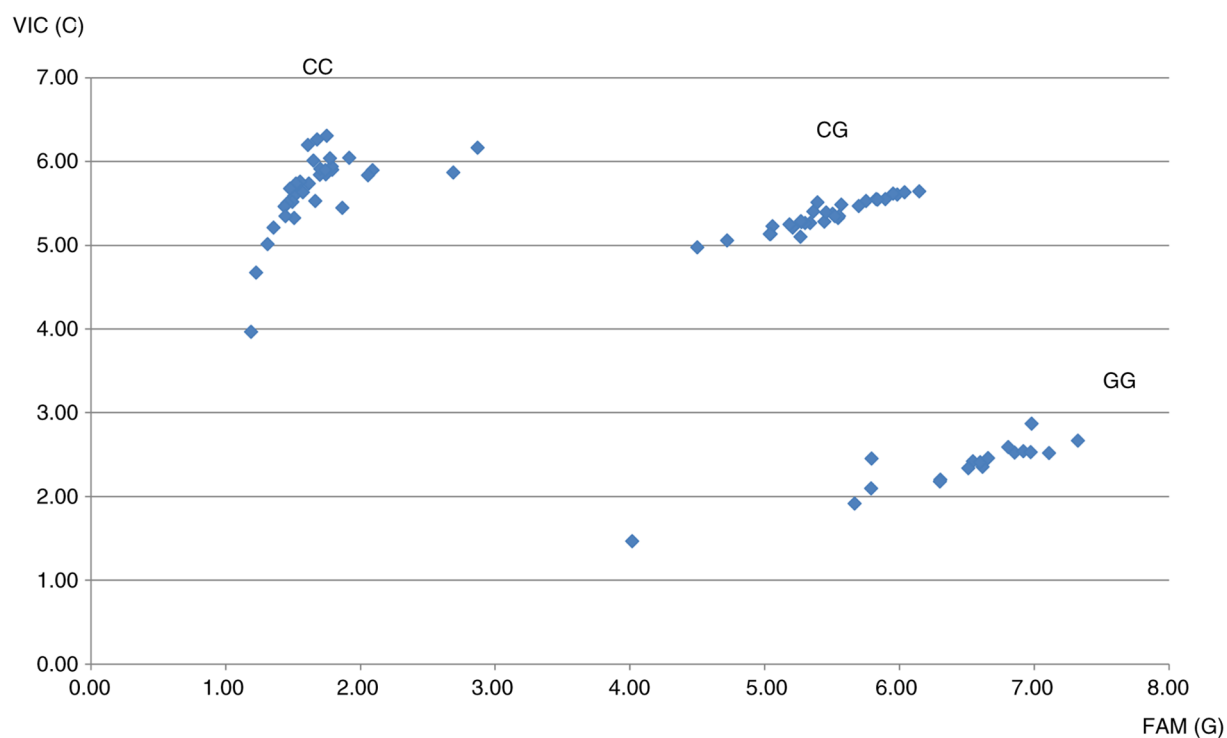

Supplement: Supplementary file 1 [file downloadSupplementary]
